# Supplementary material for: Microbial Degradation of Cellular Kinases Impairs Innate Immune Signaling and Paracrine TNFα Responses
Source: PubMed Central journal article supplement (PMC5048168; doi:10.1038/srep34656), 2016-10-04
Supplement: srep34656-s1.pdf [file srep34656-s1.pdf]

# **Microbial Degradation of Cellular Kinases Impairs Innate Immune Signaling and Paracrine TNF $\alpha$ Responses**

Kenneth Barth and Caroline Attardo Genco

**Supplemental Table 1.** Endothelial mRNA induction during *P. gingivalis* and TNF $\alpha$  stimulation

| Proinflammatory Mediator | <i>P. gingivalis</i> -dependent induction <sup>#</sup> | <i>P. gingivalis</i> + TNF $\alpha$ | TNF $\alpha$ -dependent Induction (fold) <sup>*</sup> |
|--------------------------|--------------------------------------------------------|-------------------------------------|-------------------------------------------------------|
| GM-CSF                   | 440 $\pm$ 131.8                                        | 2393 $\pm$ 736.7                    | 5.4                                                   |
| IL-8                     | 12.9 $\pm$ 1.2                                         | 38.9 $\pm$ 5.6                      | 3.0                                                   |
| MCP-1                    | 6.0 $\pm$ 1.0                                          | 21.9 $\pm$ 4.0                      | 3.7                                                   |
| M-CSF                    | 2.0 $\pm$ 0.1                                          | 13.6 $\pm$ 1.6                      | 6.8                                                   |
| Mip3 $\alpha$            | 80.7 $\pm$ 30.0                                        | 301.6 $\pm$ 37.4                    | 3.7                                                   |
| VCAM-1                   | 12.2 $\pm$ 2.5                                         | 104.4 $\pm$ 10.7                    | 8.6                                                   |
| IL-6                     | 3.9 $\pm$ 0.6                                          | 6.8 $\pm$ 1.2                       | 1.7                                                   |

<sup>#</sup> Mean mRNA fold change  $\pm$  SEM of 381 stimulated HUVEC / untreated (media)

<sup>\*</sup> Mean mRNA fold change  $\pm$  SEM of 381 stimulated HUVEC + TNF/ 381 stimulated HUVEC - TNF

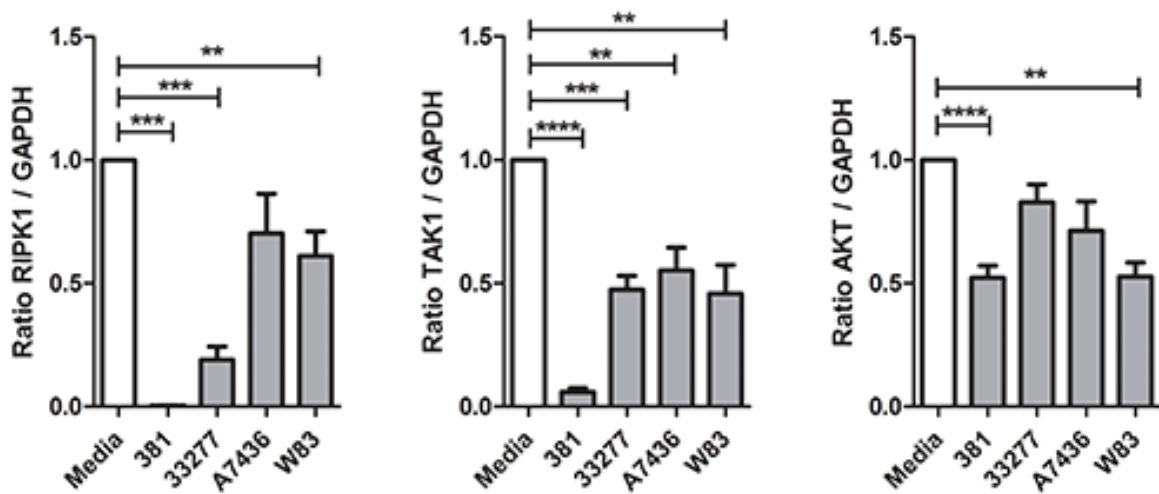

**Supplemental Figure 1. Degradation of RIPK1, TAK1, and AKT occurs across wild-type *P. gingivalis* strains.** HUVEC were cocultured with wild-type strains 381, 33277, A7436, or W83 for 2 hr. Whole cell lysates were analyzed for RIPK1, TAK1, AKT, or GAPDH expression via Western blot analysis. Relative density units was calculated for **(a)** RIPK1, **(b)** TAK1, and **(c)** AKT, setting untreated cells (media) = 1, using densitometry of three independent membranes. \*\*\*\* $p < 0.0001$ , \*\*\* $p < 0.001$ , \*\* $p < 0.01$ , \* $p < 0.05$ , using a Student's t-test comparing media to each respective wild-type strain.

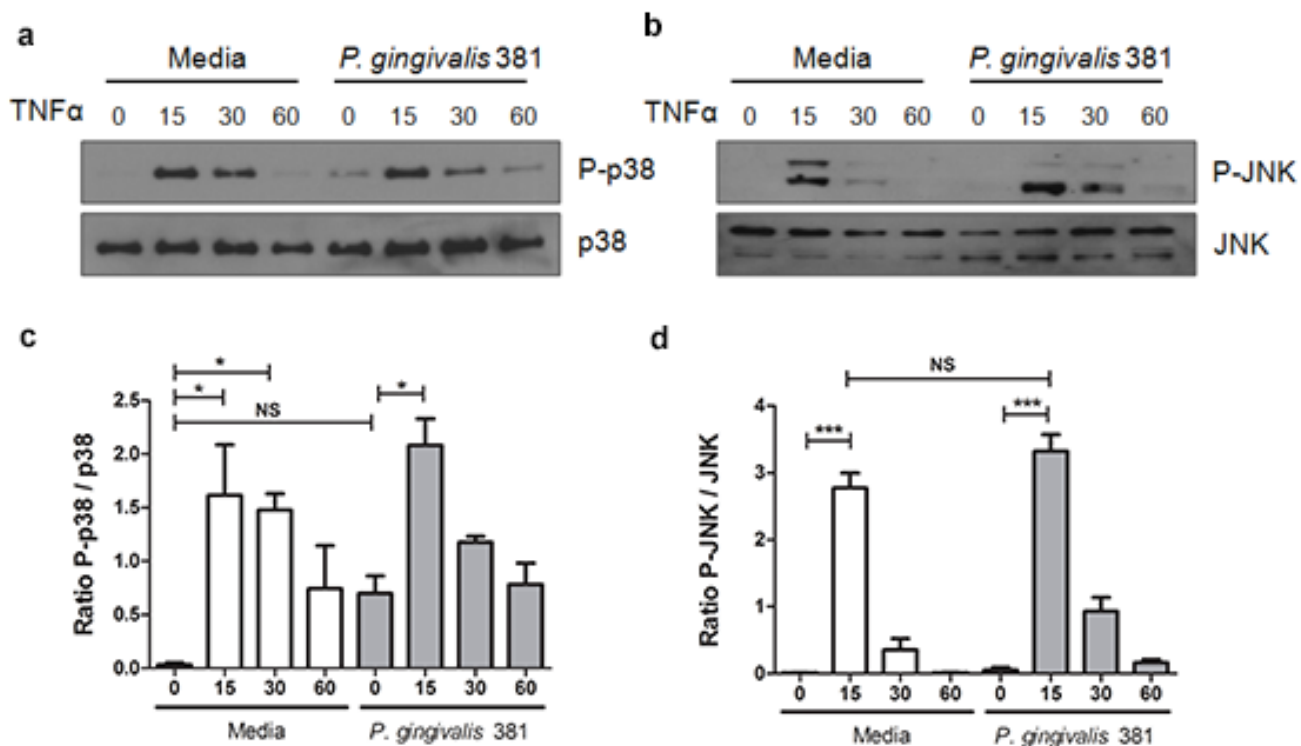

**Supplemental Figure 2. Coculture of *P. gingivalis* with endothelial cells fails to alter TNF $\alpha$ -dependent p38 or JNK activation.** Cells were either left uninfected (media) or cocultured (strain 381 MOI 100) for 2 hr at which time cells were restimulated with TNF $\alpha$  (10 ng/mL) for 15, 30, or 60 min. Whole cell lysates were examined for expression of (a) P-p38, or (b) P-JNK. The ratio of (c) P-p38 to total p38 expression or the ratio of (d) P-JNK to total JNK expression was quantified using densitometry from four independent Western blots. \*\*\* $p < 0.001$ , \* $p < 0.05$ , NS=not significant, one-way ANOVA with Bonferroni post test.

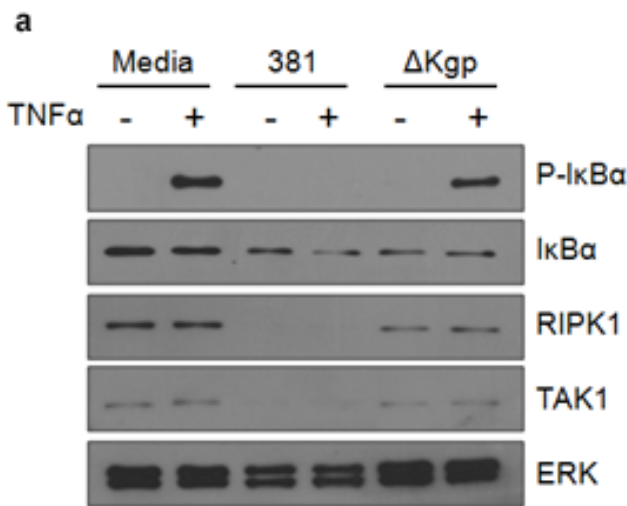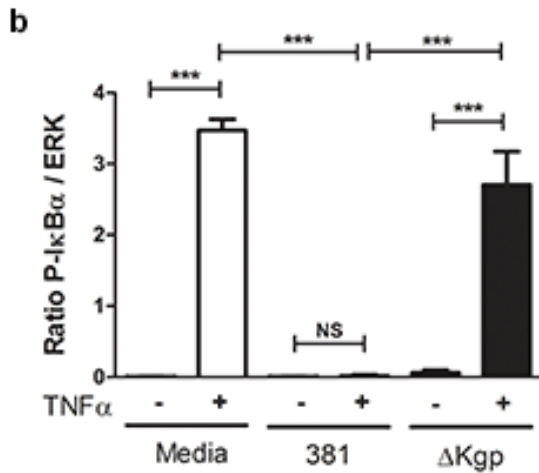

**Supplemental Figure 3. *P. gingivalis*-driven impairment of TNF $\alpha$ -dependent signaling no longer occurs during  $\Delta$ Kgp coculture. (a)** HUVEC were left untreated (media) or cocultured with MOI 100 *P. gingivalis* 381 or  $\Delta$ Kgp for 2 hr, followed by TNF $\alpha$  restimulation (10 ng/mL) for 60 min. Protein expression of phosphorylated and non-phosphorylated IkB $\alpha$  was measured via Western blot analysis. **(b)** The ratios of P-IkB $\alpha$ /ERK were calculated using densitometry (n=4). Values represent the mean + SEM, one-way ANOVA with Bonferroni post test. \*\*\*p<0.001, NS=not significant.

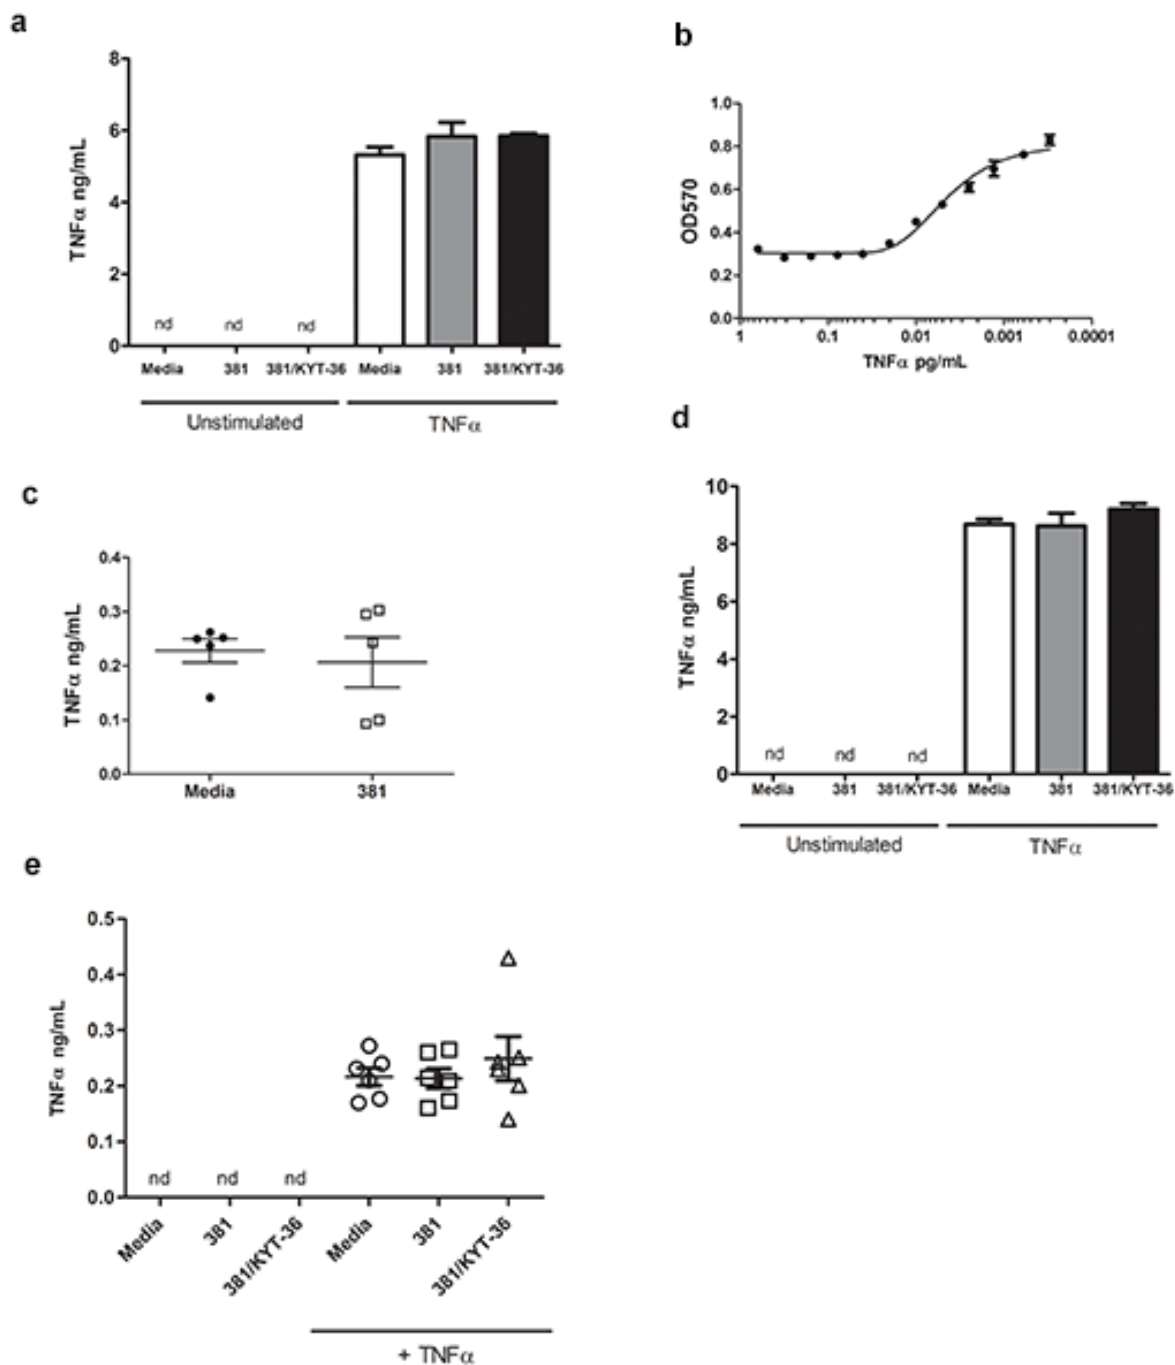

**Supplemental Figure 4. Exogenously added TNF $\alpha$  is not degraded and remains bioactive during coculturing with *P. gingivalis*.** (a) HUVEC were left untreated or cocultured with *P. gingivalis* MOI 100 (381 or 381 pretreated with 10  $\mu$ M KYT-36) for 2 hr. Cultures were then left unstimulated or stimulated with TNF $\alpha$  (10 ng/mL) for 60 min. Cell culture supernatants were collected and assayed for TNF $\alpha$  levels by ELISA (n=3). (b,c) 2  $\mu$ l of each supernatant recovered from (a) was further used to measure the bioactivity of TNF $\alpha$  remaining under each condition by monitoring L929 cytotoxicity. (b) A standard curve for % cell viability was established using a range of TNF $\alpha$  (0.625-0.0003 ng/mL), allowing for the (c) calculation of bioactive TNF $\alpha$  remaining during 60 min coculturing with *P. gingivalis* (n=5). Nd= not detectable. (d,e) The amount of detectable and bioactive TNF $\alpha$  was measured as in (a-c), however coculturing with *P. gingivalis* was extended to 6 hr.

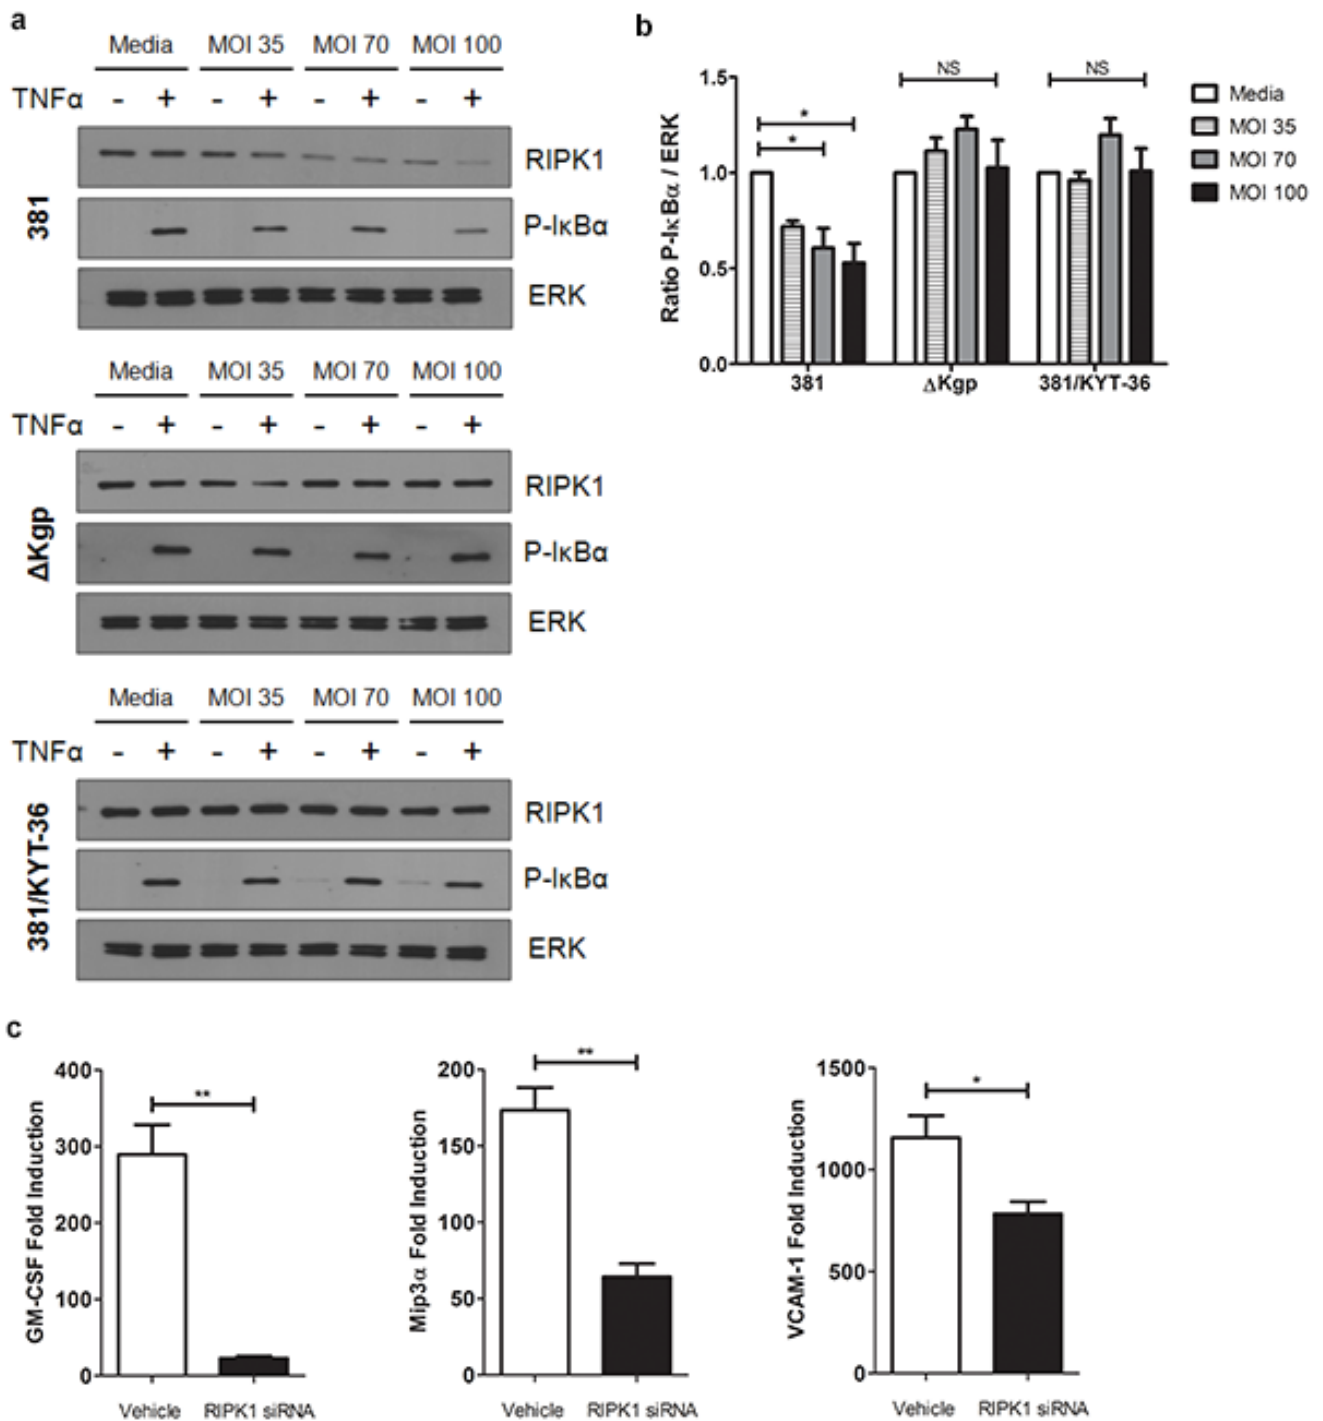

**Supplemental Figure 5. Endothelial TNF $\alpha$ -dependent signaling and inflammatory mediator induction requires RIPK1 signaling. (a,b)** HUVEC were left untreated or cocultured with *P. gingivalis* (381,  $\Delta$ Kgp, 381/KYT-36) at varying MOIs (35, 70, 100) for 2 hr. **(a)** RIPK1 and P-I $\kappa$ B $\alpha$  expression was monitored via Western blot analysis. **(b)** Densitometry (n=3) was used to calculate the ratio of P-I $\kappa$ B $\alpha$  /ERK. \*p<0.05, NS=not significant, one-way ANOVA with Bonferroni post test comparing the effect of MOI for each strain. **(c)** HUVEC were transfected with either negative control or RIPK1 specific siRNA for 20 hr, followed by coculturing with *P. gingivalis* 381 MOI 100 for 2 hr and then restimulation with TNF $\alpha$  (10 ng/mL) for 6 hr. Immune activation was monitored via qPCR expression analysis. \*\*p<0.01, \*p<0.05, student's t-test.

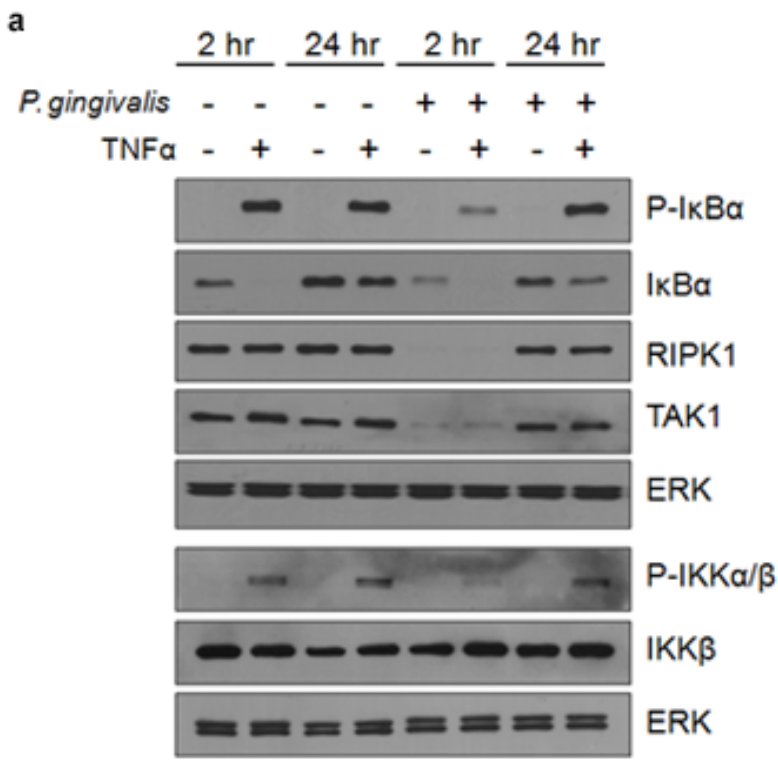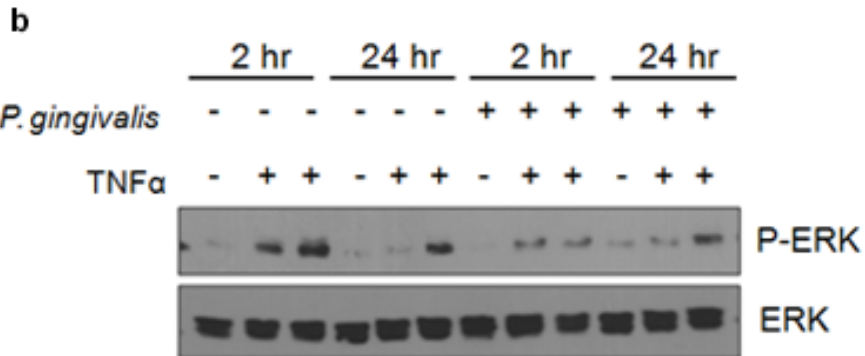

**Supplemental Figure 6. Impaired cellular signaling correlates with both RIPK1 and TAK1 protein abundance.** HUVEC were left untreated or cocultured with 381 for 2 or 24 hr, followed by TNF $\alpha$  restimulation for 60 min (top panel), 15 min (bottom panel) **(a)**, or 5 and 15 min **(b)**. Whole cell lysates were examined for endothelial responsiveness to TNF $\alpha$  by measuring activation status of IkBa, IKK $\alpha/\beta$ , and ERK-specific pathways.



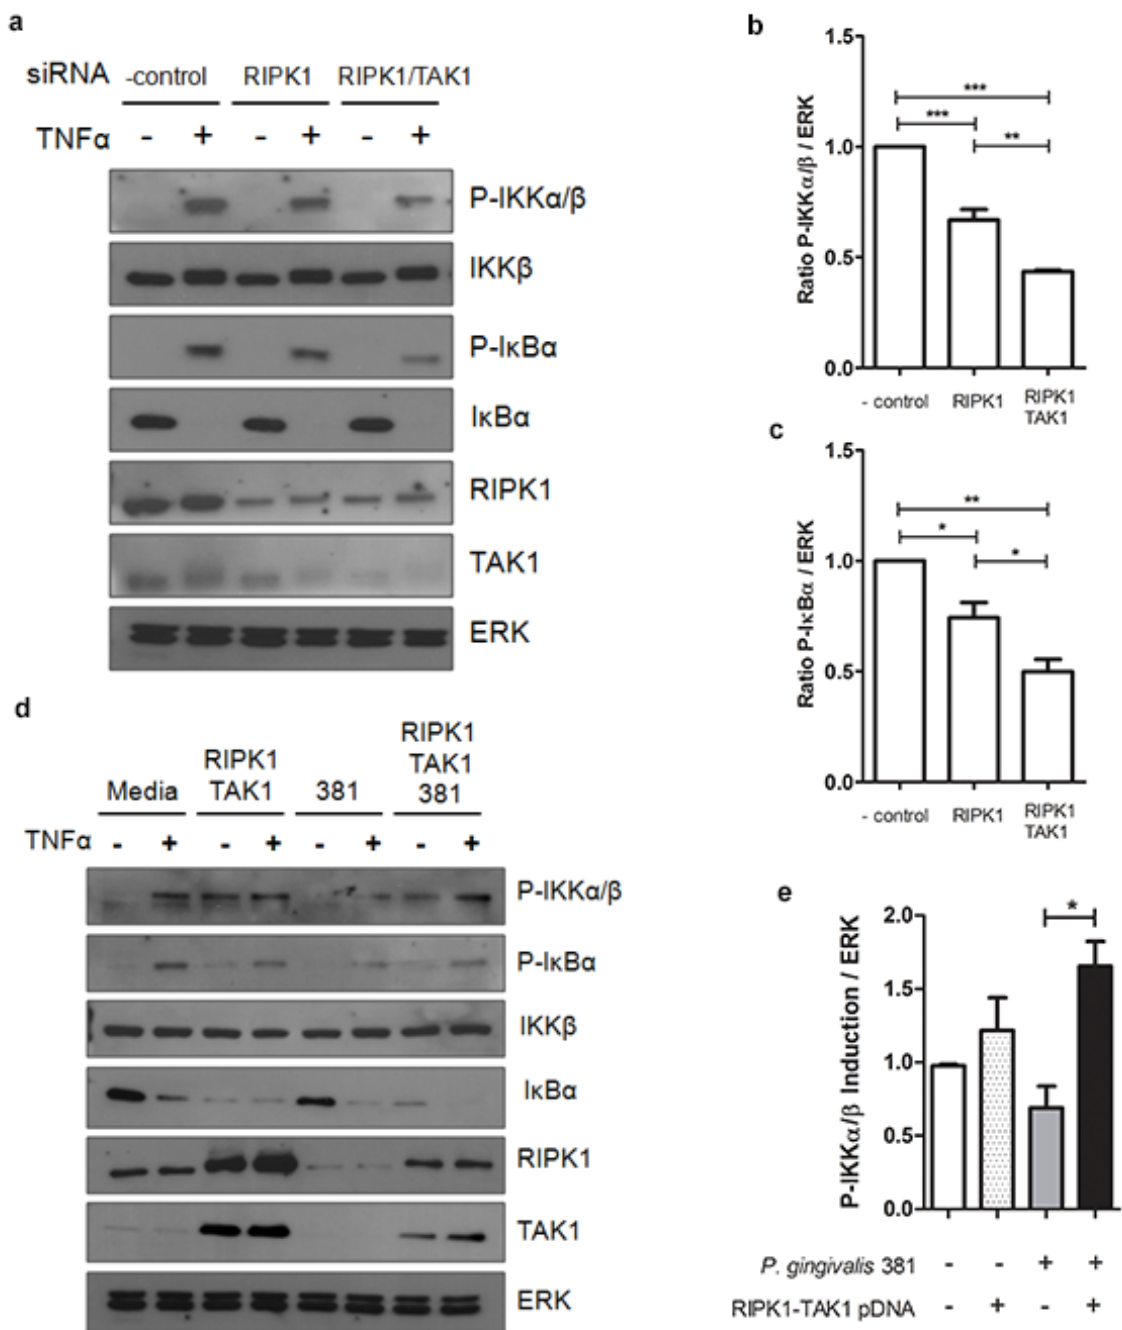

**Supplemental Figure 7. RIPK1 and TAK1 protein abundance is required for optimal innate immune responses to TNF $\alpha$ .**

**(a-c)** HUVEC were transfected with either negative control or RIPK1 specific siRNA for 20 hr, followed by stimulation with TNF $\alpha$  (10 ng/mL) for 15 min. **(a)** Whole cell lysates were examined via Western blot analysis to determine activation status of the cells and to confirm efficient knockdown of RIPK1 and TAK1. Densitometry of independent membranes (n=3) was used to determine **(b)** P-IKK $\alpha/\beta$  and **(c)** P-I $\kappa$ B $\alpha$  expression. \*\*\*p<0.001, \*\*p<0.01, \*p<0.05, one-way ANOVA with Tukey's post test. **(d,e)** HeLa cells were transfected with empty vector (-) or 1  $\mu$ g RIPK1-myc + 1  $\mu$ g TAK1-FLAG. After 20 hr, cells were left uninfected or cocultured with *P. gingivalis* 381 MOI 100 for 2 hr, followed by restimulation with TNF $\alpha$  (10 ng/mL) for 15 min. **(d)** Whole cell lysates were examined via Western blot analysis to confirm overexpression of RIPK1 and TAK1 signaling proteins, in addition to TNF $\alpha$ -dependent activation status. **(e)** P-IKK $\alpha/\beta$  induction was calculated by subtracting P-IKK $\alpha/\beta$  signal of + TNF $\alpha$  treated from - TNF $\alpha$  treated samples for each condition (n=3). Media control samples with empty vector was set = 1 R.D.U. \*p<0.05 one-way ANOVA with Tukey's post test.

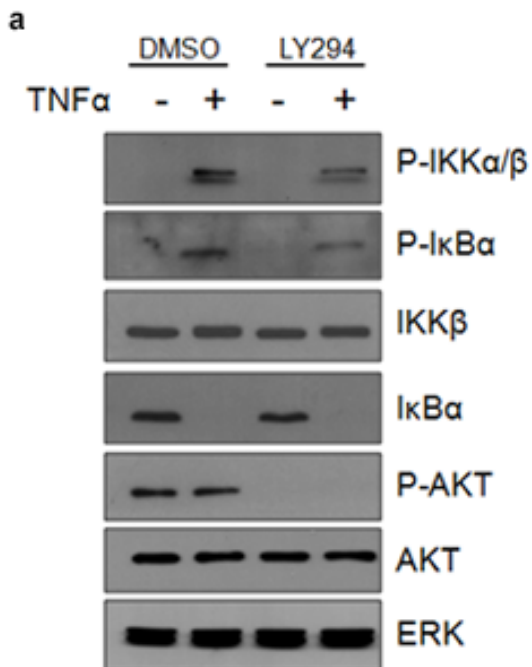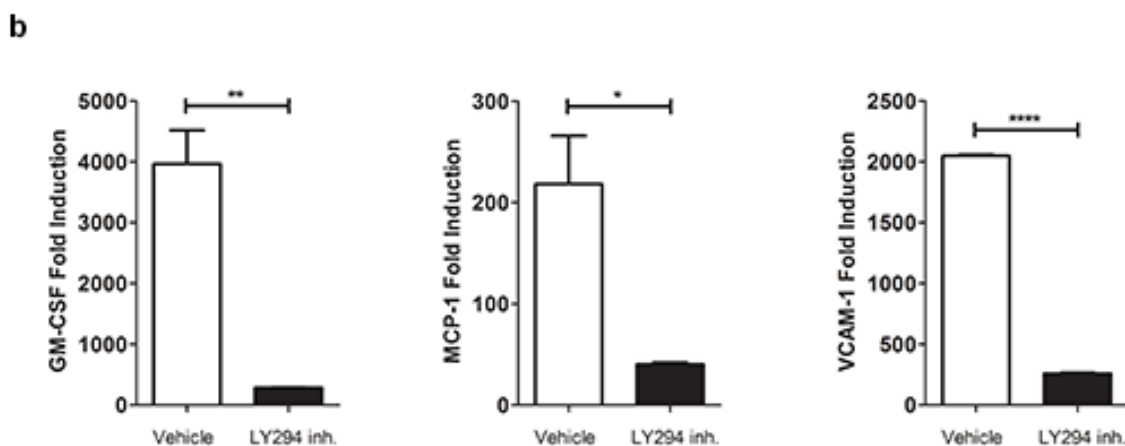

**Supplemental Figure 8. AKT is required for maximal endothelial cellular responsiveness to TNF $\alpha$ .** (a) HUVEC were pretreated with vehicle control (DMSO) or LY294 inhibitor (25  $\mu$ M) for 3 hr, followed by stimulation with TNF $\alpha$  (10 ng/mL) for 15 min. Whole cell lysates were examined via Western blot analysis to determine TNF $\alpha$ -dependent activation status. (b) HUVEC were pretreated with Ly294 inhibitor (25  $\mu$ M) for 1 hr, followed by coculturing with *P. gingivalis* 381 MOI 100 for 2 hr and restimulation with TNF $\alpha$  for 6 hr. Immune activation was monitored via qPCR expression analysis. \*\*\*\* $p$ <0.0001, \*\* $p$ <0.01, \* $p$ <0.05, student's t-test.

**Supplemental Table 2.** Bacterial strains used in this study.

| <i>P. gingivalis</i> strain | Characteristics<br>(Genetic background)        | Source                |
|-----------------------------|------------------------------------------------|-----------------------|
| 381                         | Wild type                                      | Laboratory Collection |
| DPG3                        | Major fimbriae mutant (381)                    | (1)                   |
| MF1                         | Minor fimbriae mutant (381)                    | (2)                   |
| MFB                         | Major and minor fimbriae mutant<br>(381)       | (2)                   |
| ATCC 33277                  | Wild type                                      | Laboratory Collection |
| $\Delta$ RgpA               | <i>rgpA</i> mutant (33277)                     | (3)                   |
| $\Delta$ RgpA/B             | <i>rgpA</i> - and <i>rgpB</i> - mutant (33277) | (4)                   |
| $\Delta$ Kgp                | <i>kgpA</i> mutant (33277)                     | (3)                   |
| A7436                       | Wild type                                      | Laboratory Collection |
| W83                         | Wild type                                      | Laboratory Collection |

1. Malek, R. *et al.* Inactivation of the Porphyromonas gingivalis fimA gene blocks periodontal damage in gnotobiotic rats. *J Bacteriol* **176**, 1052-1059 (1994).
2. Takahashi, Y., Davey, M., Yumoto, H., Gibson, F.C. 3<sup>rd</sup> & Genco, C.A. Fimbriae-dependent activation of pro-inflammatory molecules in Porphyromonas gingivalis infected human aortic endothelial cells. *Cell Microbiol* **8**, 738-757 (2006).
3. Park, Y. & Lamont, R.J. Contact-dependent protein secretion in Porphyromonas gingivalis. *Infect Immun* **66**, 4777-4782 (1998).
4. Nakayama, K., Kadowaki, T., Okamoto, K. & Yamamoto, K. Construction and characterization of arginine-specific cysteine proteinase (Arg-gingipain)-deficient mutants of Porphyromonas gingivalis. Evidence for significant contribution of Arg-gingipain to virulence *J Biol Chem* **270**, 23619-23626 (1995).
